# Supplementary material
Source: Springer Nature journal article supplement (https://www.springermedizin.de/resource/supplementary/12950_2009_165_MOESM5_ESM.pdf/9558106)

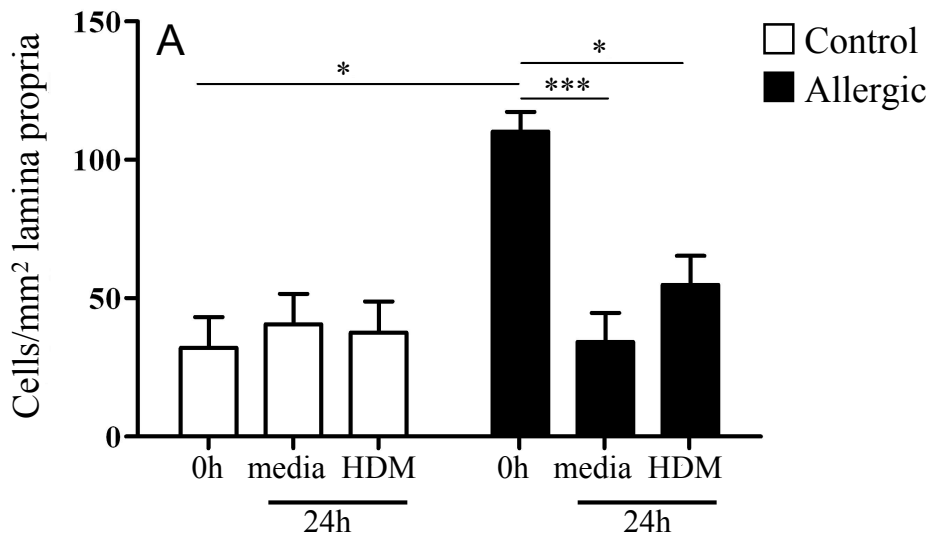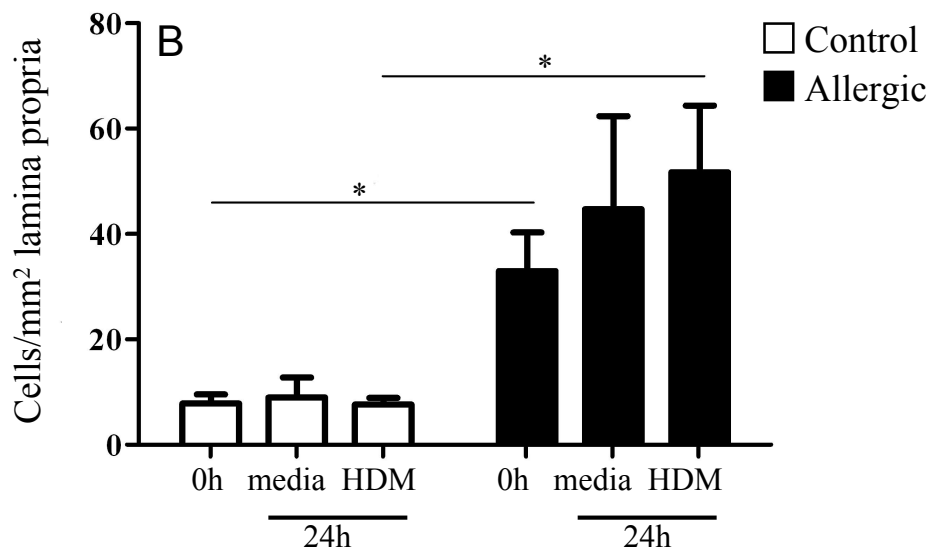

Treatments

Supplement: MOESM5 [file 9558106]
